# Supplementary material
Source: ML conference proceedings conference paper supplement (https://proceedings.neurips.cc/paper_files/paper/2020/hash/19eca5979ccbb752778e6c5f090dc9b6-Abstract.html)

Berlin 56 locations 50 agents 10 types

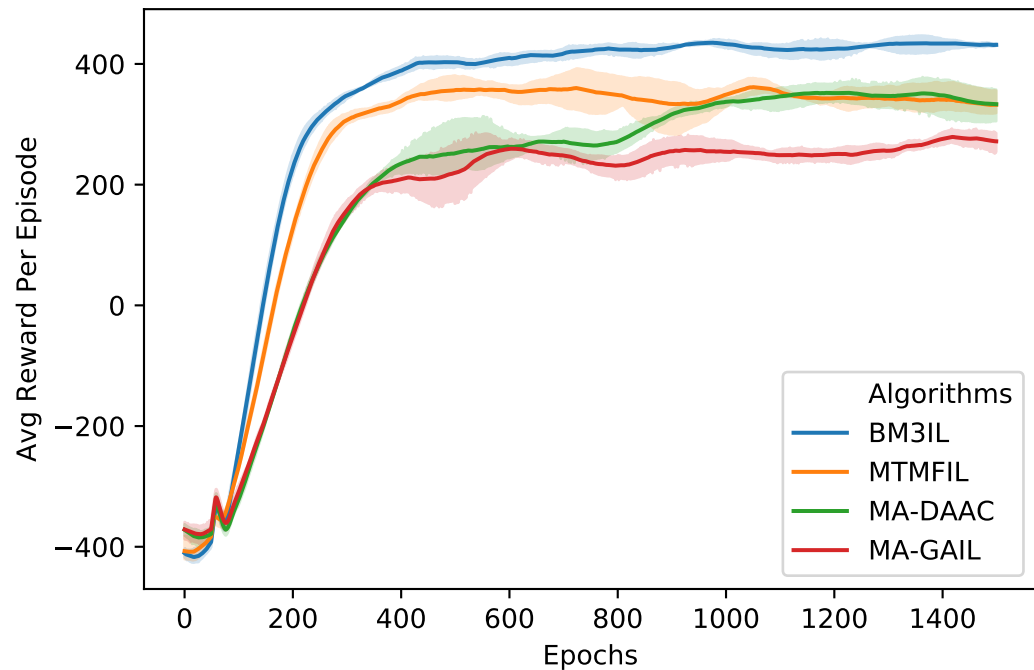

Supplement: Supplementary file [file 19eca5979ccbb752778e6c5f090dc9b6-Supplemental.zip]
